# Supplementary material
Source: Research Square preprint supplement (doi:10.21203/rs.3.rs-8935745/v1)
Supplement: Supplementary file 1 [file d394f2bcd9cedcc9075ee08e.docx]

**Supporting Information**

**Concentration-dependent modes of melittin-induced membrane destabilization: an integration of experimental and computational tools**

**Andrea Chacón Calderón1,Pavel Zelenovskii2,Marcio Soares1,Ellen C. Wrobel3,Osvaldo N. Oliveira Jr.3,Daniel Pereira1,Luís Mafra1,Mariana Sardo1,Ildefonso Marín-Montesinos1, Ana Barros-Timmons1**

1Department of Chemistry & CICECO−Aveiro Institute of Materials, University of Aveiro, 3810-193 Aveiro, Portugal.

2Department of Physics & CICECO−Aveiro Institute of Materials, University of Aveiro, Aveiro 3810-193, Portugal.

3 Sao Carlos Institute of Physics, University of Sao Paulo, CP 369, 13560-970 São Carlos, SP, Brazil

**Contents**

**Table S1.** PM-IRRAS frequencies of the pure lipids, DOPE:DPPG and (DOPE:DPPG):MLT monolayers on 5 mM HEPES buffer subphase at a surface pressure of 30 mN m-1.

**Table S2.** Size and size distribution by intensity obtained by dynamic light scattering for MLVs of DOPE:DPPG, (DOPE:DPPG):MLT 30:1 and 10:1 ratio.

**Table S3.** 1H and 13C chemical shifts changes for MLVs of DOPE:DPPG, (DOPE:DPPG):MLT 30:1 and 10:1 ratio.

**Table S4.** 31P chemical shifts for the deconvoluted spectra and T1 relaxation times for MLVs of DOPE:DPPG, (DOPE:DPPG):MLT 30:1 and 10:1 ratio.

**Figure S1.** Effect of melittin on Langmuir monolayers observed by Brewster angle microscopy.

**Figure S2.** Interaction of melittin with thin lipid filmsobserved by AFM topographical and phase images of the lipid films.

**Figure S3.** Size distribution changes induced in MLVs by melittin.

**Figure S4.** Snapshots from the top view of the initial step (1 ns) of the MD runs for systems I, II, and III.

**Figure S5.** Density profiles for systems I, II and III averaged over 200 ns of sampling.

**Table S1.** PM-IRRAS frequencies of the pure lipids, DOPE:DPPG and (DOPE:DPPG):MLT monolayers on 5 mM HEPES buffer subphase at a surface pressure of 30 mN m-1.

| Subphase | Composition | PM-IRRAS signal wavenumber (cm-1) | | | | | |
| --- | --- | --- | --- | --- | --- | --- | --- |
| *v*as(CH2) | *v*s(CH2) | *v*(C=O) | *v*sci(CH2) | *v*as(PO2-) | *v*s(PO2-) |
| Buffer | DOPE | 2918 | 2856 | 1740 | 1470 | 1218 | 1076 |
| DPPG | 2918 | 2849 | 1732 | 1468 | 1220 | 1094 |
| DOPE:DPPG 8:2 | 2928 | 2851 | 1739 | 1458 | 1227 | 1065 |
| (DOPE:DPPG):  MLT 30:1 | **2917** | **2847** | 1740 | - | 1227 | **1080** |
| (DOPE:DPPG):  MLT 10:1 | 2928 | - | 1738  **1714** | 1477 | **1224** | **1060** |

**Table S2.** Size and size distribution by intensity obtained by dynamic light scattering for MLVs of DOPE:DPPG, (DOPE:DPPG):MLT 30:1 and 10:1 ratio. The intensity percentage of each population is shown inside the parenthesis.

| **Peak (in descending order of intensity)** | **DOPE:DPPG** | **(DOPE:DPPG):MLT 30:1** | **(DOPE:DPPG):MLT 10:1** |
| --- | --- | --- | --- |
| **Peak 1 (%)** | 890.9 ± 498.7 nm (73.9) | 687.1 ± 311.8 nm (85.6) | 333.1 ± 105.1 nm(79.3) |
| **Peak 2 (%)** | 126.4 ± 43.11 nm (19.8) | 103.6 ± 37.05 nm (12.2) | 63.12 ± 16.01 nm (12.5) |
| **Peak 3 (%)** | 4706 ± 824.3 nm (6.3) | 5047 ± 584.3 nm (1.9) | 4677 ± 880.3 nm (8.2) |

**Table S3.** 1H and 13C chemical shifts changes for DOPE:DPPG 8:2 MLVs in the presence of melittin at lipid:peptide ratios of 30:1 and 10:1.

| Signal | 1H chemical shift (ppm) | | | Signal | 13C chemical shift (ppm) | | |
| --- | --- | --- | --- | --- | --- | --- | --- |
| DOPE:DPPG | (DOPE:DPPG):  MLT 30:1 | (DOPE:DPPG):  MLT 10:1 | DOPE:DPPG | (DOPE:DPPG):  MLT 30:1 | (DOPE:DPPG):  MLT 10:1 |
| ω | 0,95 | 0,96 | 0,96 | ω | 14,53 | 14,4 | 14,41 |
| (CH2)n | 1,36 | 1,37 | 1,36 | ω-1 | 23,33 | 23,21 | 23,18 |
| C8, 11 | 2,10 | 2,10 | 2,09 | ω-2 | 32,68 | 32,57 | 32,51 |
| C9, 10 | 5,38 | 5,40 | 5,39 | (CH2)n | 30,14 | 30,08 | 30,05 |
| C3 | 1,68 | 1,65 | 1,63 | C8, 11 | 27,99 | 27,95 | 27,9 |
| C2 | 2,40 | 2,33 | 2,30 | C3 | 25,71 | 25,89 | 25,98 |
| 2,45 | 2,42 | 2,39 | C2 | 34,85 | 35,43 | 35,76 |
| g1 | 4,53 | 4,50 | - | g1 | 62,93 | 62,94 | 62,95 |
| g2 | - | 5,08 | 5,08 | g2 | 71,7 | 71,96 | 71,97 |
| g3-PE | 4,30 | 4,36 | - | g3 | 67,53 | 67,69 | 67,72 |
| g3-PG | 4,10 | 4,12 | 4,11 | αPE | 63,47 | 63,56 | 63,62 |
| αPE | 4,17 | 4,20 | 4,19 | βPE | 41,34 | 41,53 | 41,58 |
| βPE | 2,99 | 3,05 | 3,07 | αPG | 69,4 | 69,53 | 69,64 |
| αPG | 3,93 | 3,96 | 3,96 | ßPG | 64,61 | 66,02 | 66,08 |
| ßPG | 3,68 | 3,70 | 3,69 | yPG | 63,81 | 64,58 | 64,74 |
| yPG | 3,34 | 3,36 | 3,35 |  |  |  |  |

**Table S4.** 31P chemical shifts for the deconvoluted spectra and T1 relaxation times for the DOPE:DPPG liposomes with and without melittin.

| Signal | |∆| 31P chemical shift (ppm) | | 31P relaxation time T1 (s) | | |
| --- | --- | --- | --- | --- | --- |
| (DOPE:DPPG):MLT 30:1 | (DOPE:DPPG):MLT  10:1 | DOPE:DPPG | (DOPE:DPPG):MLT 30:1 | DOPE:DPPG):MLT  10:1 |
| DOPE | 0.35 | 0.32 | 0.42 | 0.14 | 0.18 |
| DPPG | 0.56 | 0.53 | 0.04 | 1.82 | 1.40 |

**
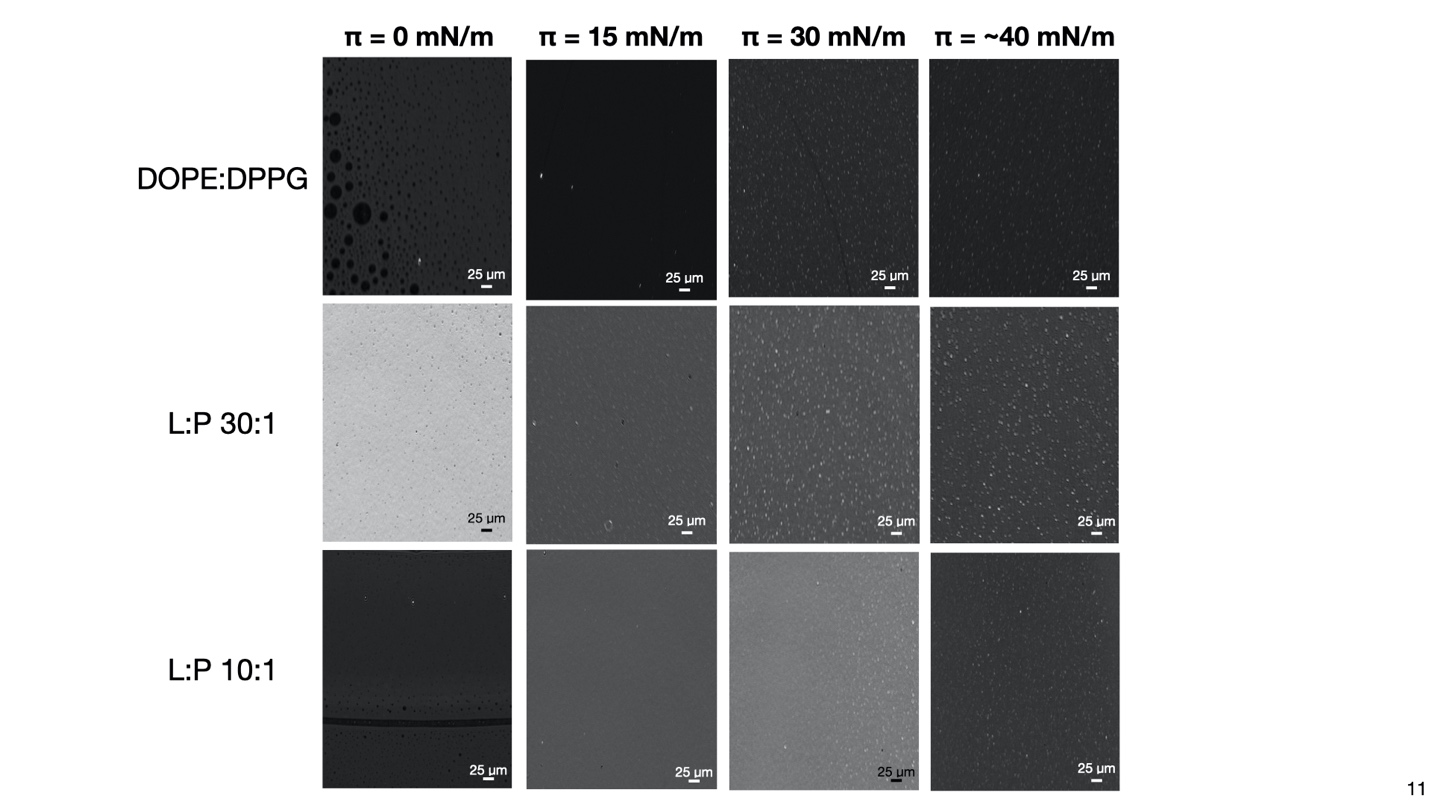
**

**Figure S1. Effect of melittin on Langmuir monolayers.** Images obtained by Brewster angle microscopy of Langmuir monolayers of DOPE:DPPG, (DOPE:DPPG):MLT 30:1 and 10:1 ratio, at different surface pressure of the compression isotherms (see Figure 1).


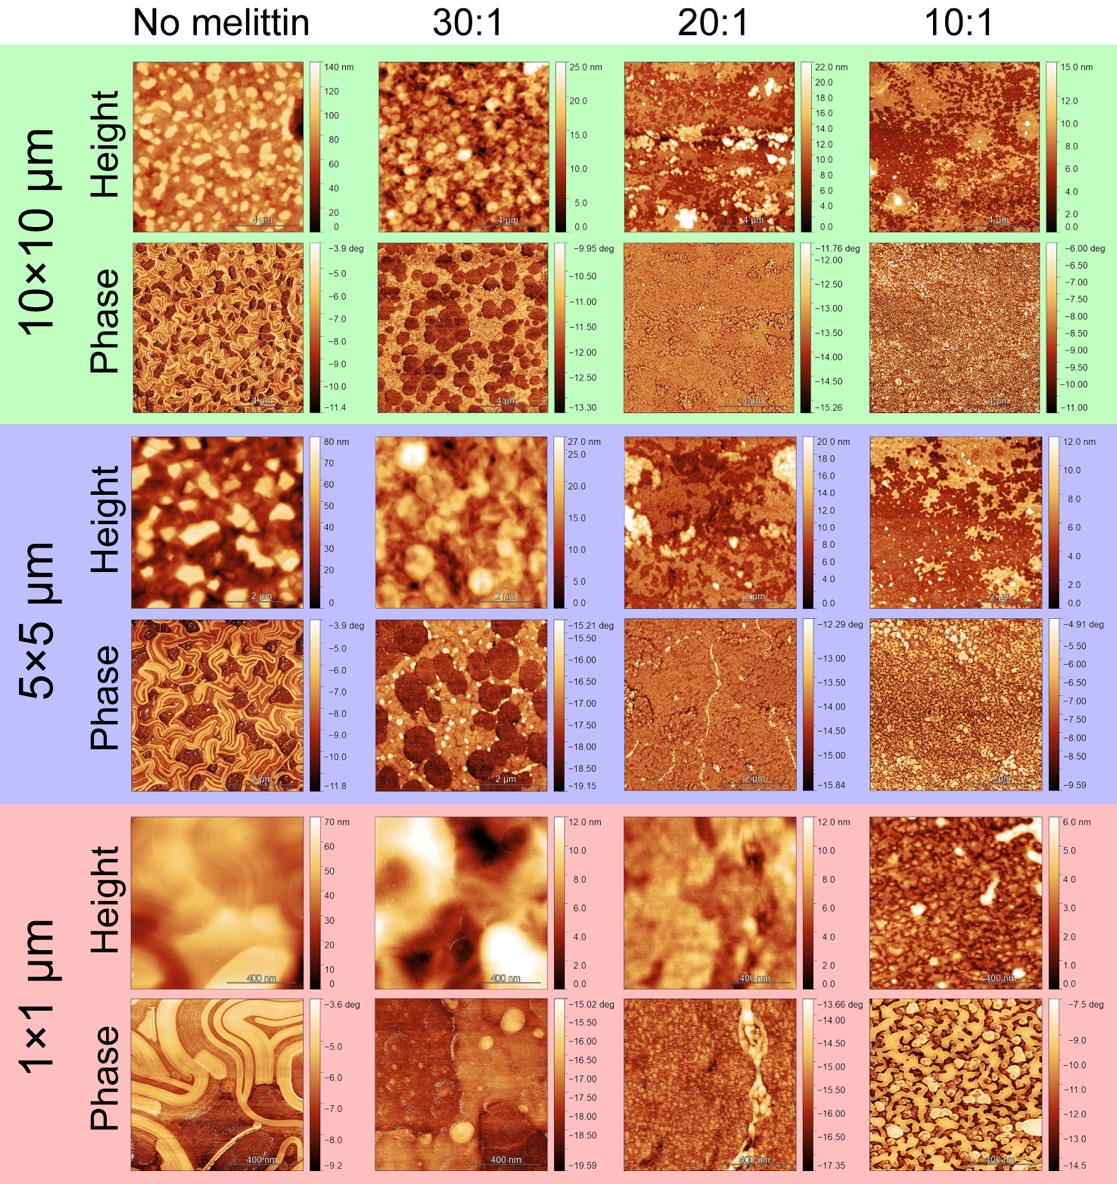


**Figure S2. Interaction of melittin with thin lipid films.** AFM topographical and phase images of the lipid films of (from left to right) DOPE:DPPG, (DOPE:DPPG):MLT 30:1, 20:1 and 10:1 ratio.


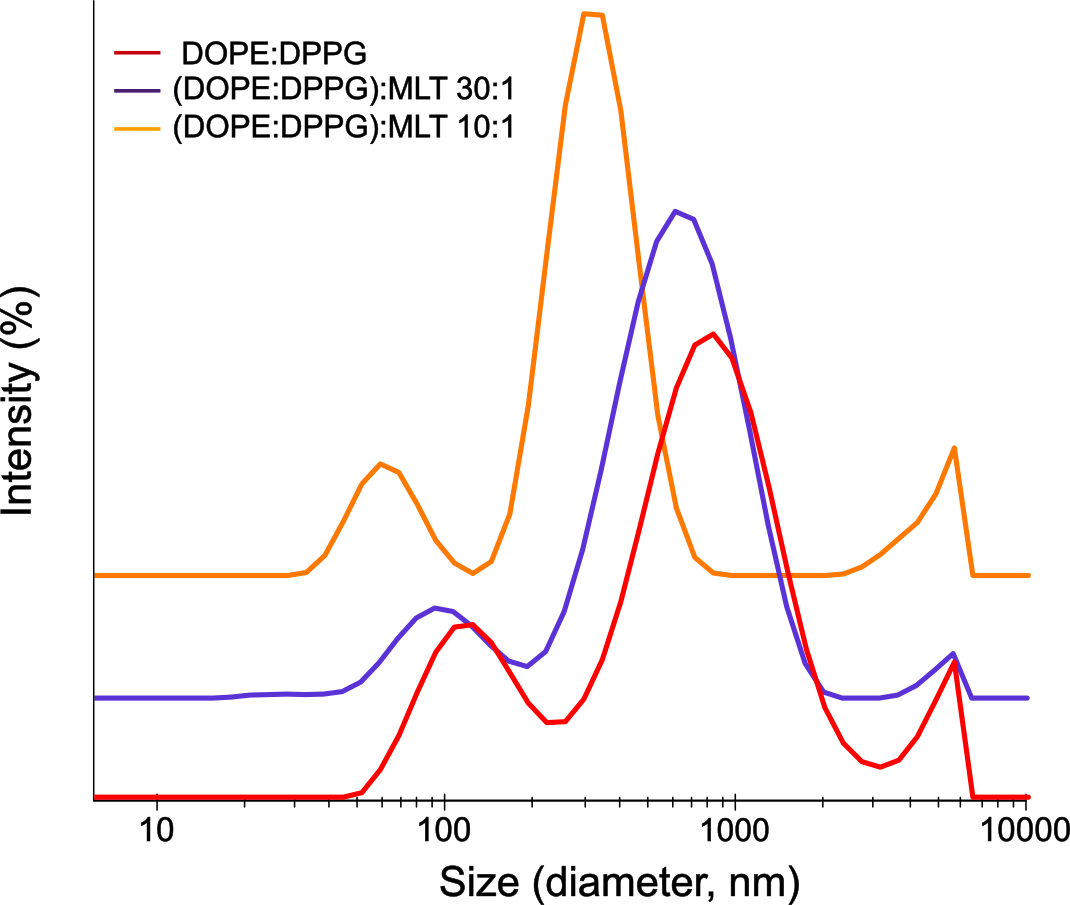


**Figure S3. Size distribution changes induced in MLVs by melittin.** Size distribution by intensity fraction of DOPE:DPPG, (DOPE:DPPG):MLT 30:1 and 10:1 ratio MLVs suspensions.


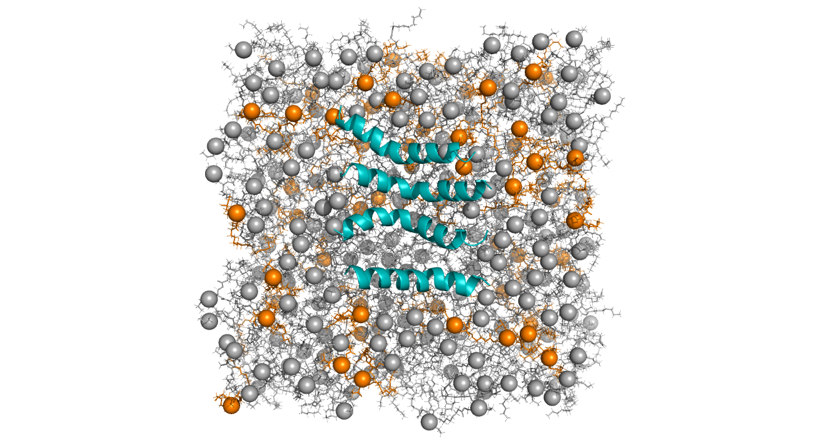

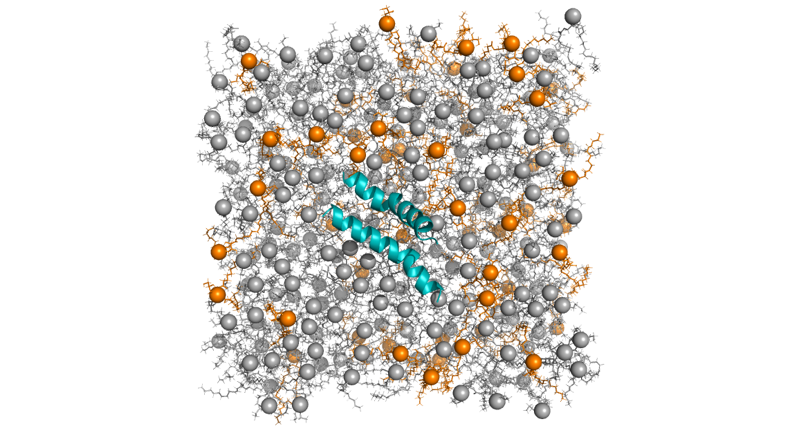

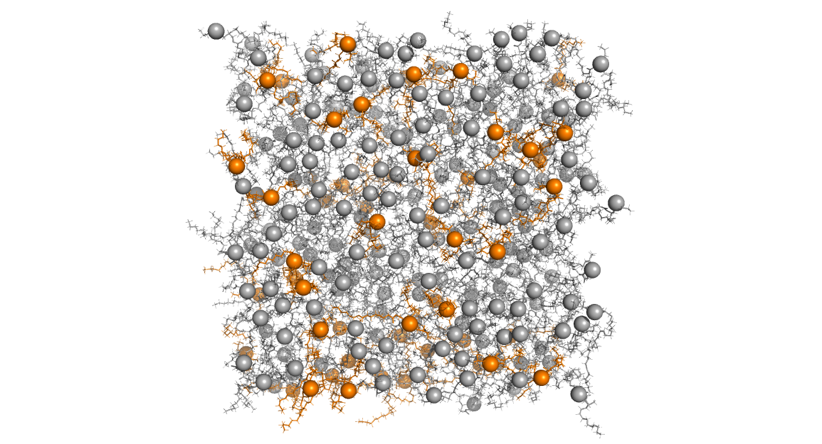


I

II

III

**Figure S4.** Snapshots from the top view of the initial step (1 ns) of the MD runs for systems I, II, and III. DOPE and DPPG phospholipid are shown in grey and orange, respectively. The P atoms are shown as spheres. Water molecules and ions are omitted for clarity.


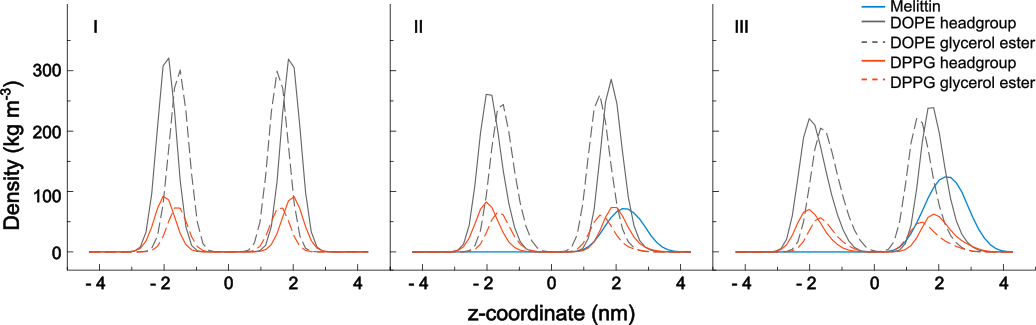


**Figure S5.** Density profiles for systems I, II and III showing the DOPE (grey) and DPPG (orange) corresponding headgroups (solid line) and glycerol ester groups (dashed line), and the protein (blue). The densities were averaged over 200 ns of sampling.
